# Supplementary material
Source: ML conference proceedings conference paper supplement (https://proceedings.neurips.cc/paper_files/paper/2015/hash/3c7781a36bcd6cf08c11a970fbe0e2a6-Abstract.html)
Supplement: Supplementary file [file 3c7781a36bcd6cf08c11a970fbe0e2a6-Supplemental.zip]

---

## Supplementary Materials: M-Best-Diverse Labelings for Submodular Energies and Beyond

---

*Proof of Theorem 1.* Let us consider the operation  $\text{order}(\{\mathbf{y}\}, i, j)$ , which takes a set of labelings  $\{\mathbf{y}\} \in (L_V)^M$ , two indices  $i < j \in 1, \dots, M$  and replaces labelings  $\mathbf{y}^i$  and  $\mathbf{y}^j$  by their node-wise minimum  $\mathbf{y}^i \wedge \mathbf{y}^j$  and maximum  $\mathbf{y}^i \vee \mathbf{y}^j$  respectively. As a result, this operation returns the new set of labelings:

$$(\mathbf{y}^1, \dots, \mathbf{y}^{i-1}, \mathbf{y}^i \wedge \mathbf{y}^j, \mathbf{y}^{i+1}, \dots, \mathbf{y}^{j-1}, \mathbf{y}^i \vee \mathbf{y}^j, \mathbf{y}^{j+1}, \dots, \mathbf{y}^M). \quad (17)$$

In what follows we will show that

$$E^M(\text{order}(\{\mathbf{y}\}, i, j)) \leq E^M(\{\mathbf{y}\}). \quad (18)$$

Let  $\{\mathbf{y}'\} = \text{order}(\{\mathbf{y}\}, i, j)$ . Then  $\{\mathbf{y}'\}_v$  is equal either to  $(y_v^1, \dots, y_v^i, \dots, y_v^j, \dots, y_v^M)$  or to  $(y_v^1, \dots, y_v^j, \dots, y_v^i, \dots, y_v^M)$ . Since each  $\Delta_v$  is permutation invariant,  $\Delta^M(\{\hat{\mathbf{y}}'\}) = \Delta^M(\{\hat{\mathbf{y}}\})$ . Summing it up with the following inequality, which follows from the submodularity of  $E$ ,

$$\sum_{k=1}^M E(\mathbf{y}^k) = \sum_{\substack{k=1 \\ k \neq i, k \neq j}}^M E(\mathbf{y}^k) + E(\mathbf{y}^i \wedge \mathbf{y}^j) + E(\mathbf{y}^i \vee \mathbf{y}^j) \leq \sum_{k=1}^M E(\mathbf{y}^k). \quad (19)$$

one obtains (18).

Assume the set of labelings  $\{\hat{\mathbf{y}}\} = (\hat{\mathbf{y}}^1, \dots, \hat{\mathbf{y}}^M)$  is a solution to (4):

$$\{\hat{\mathbf{y}}\} = \arg \min_{\{\mathbf{y}\}} E^M(\{\mathbf{y}\}). \quad (20)$$

Let us iteratively apply the operation  $\{\hat{\mathbf{y}}\} := \text{order}(\{\hat{\mathbf{y}}\}, i, j)$  such, that indexes  $i$  and  $j$  follow the bubble-sort algorithm [1]. Each operation performs sorting for a single pair  $i < j$  of indexes and due to (18) the energy  $E^M\{\hat{\mathbf{y}}\}$  does not increase after the operation. As a result of the algorithm we obtain the ordered labeling set  $\{\hat{\mathbf{y}}\}$  satisfying

$$E^M(\{\hat{\mathbf{y}}\}) \leq \min_{\{\mathbf{y}\}} E^M(\{\mathbf{y}\}), \quad (21)$$

which finalizes our proof. □

*Proof of Lemma 1.* Since  $E$  is submodular and each  $\Delta_v^M$  is permutation invariant we can apply Theorem 1 for  $E^M$ . This implies that  $E^M$  has an ordered minimizer  $\{\mathbf{y}^*\}$  and  $\hat{E}^M(\{\mathbf{y}^*\}) = E^M(\{\mathbf{y}^*\})$ .

Since the diversity controlling parameter  $\lambda > 0$ , the value of  $-\lambda \hat{\Delta}_v^M(y^1, \dots, y^M)$  is equal to  $+\infty$  for an unordered set  $(\mathbf{y}^1, \dots, \mathbf{y}^M)$ . Therefore,  $\hat{E}^M(\{\mathbf{y}\})$  can be represented as follows:

$$\hat{E}^M(\{\mathbf{y}\}) = \begin{cases} E^M(\{\mathbf{y}\}), & \mathbf{y}^1 \leq \mathbf{y}^2 \leq \dots \leq \mathbf{y}^M \\ \infty, & \text{otherwise} \end{cases}. \quad (22)$$

This implies  $\arg \min_{\{\mathbf{y}\}} \hat{E}^M(\{\mathbf{y}\}) \subseteq \arg \min_{\{\mathbf{y}\}} E^M(\{\mathbf{y}\})$ , which finalizes the proof. □

*Proof of Lemma 2.* Let us consider  $f(\mathbf{y}) = -\sum_{i=1}^M \sum_{j=i+1}^M \left(3^{\max(0, y^i - y^j)} - 1\right)$ . This potential is a sum of pairwise potentials  $f_{ij}(y^i, y^j) = -\left(3^{\max(0, y^i - y^j)} - 1\right)$ . They are supermodular, which can be checked directly by definition. Moreover, by construction

$$f(\mathbf{y} \vee \mathbf{z}) + f(\mathbf{y} \wedge \mathbf{z}) = f(\mathbf{y}) + f(\mathbf{z}) \quad (23)$$

if either (i) both  $\mathbf{y}$  and  $\mathbf{z}$  are ordered vectors or (ii)  $\mathbf{y}$  and  $\mathbf{z}$  are comparable, i.e.  $(\mathbf{y} \vee \mathbf{z}, \mathbf{y} \wedge \mathbf{z})$  is either equal to  $(\mathbf{y}, \mathbf{z})$  or to  $(\mathbf{z}, \mathbf{y})$ . Let us verify supermodularity of (15) by definition, i.e. for any  $\mathbf{y} \in (L_v)^M$  and  $\mathbf{z} \in (L_v)^M$ , the following inequality has to be satisfied:

$$\hat{\Delta}_v(\mathbf{y} \vee \mathbf{z}) + \hat{\Delta}_v(\mathbf{y} \wedge \mathbf{z}) \geq \hat{\Delta}_v(\mathbf{y}) + \hat{\Delta}_v(\mathbf{z}). \quad (24)$$

For any ordered  $\mathbf{y} \in (L_v)^M$  it holds  $f(\mathbf{y}) = 0$ . Therefore, taking into account (14), the inequality (24) holds for any ordered  $\mathbf{y}$  and  $\mathbf{z}$ . For any comparable  $\mathbf{y}$  and  $\mathbf{z}$  the inequality (24) is trivial. For any other  $\mathbf{y}$  and  $\mathbf{z}$  the following strict inequality holds  $f(\mathbf{y} \vee \mathbf{z}) + f(\mathbf{y} \wedge \mathbf{z}) > f(\mathbf{y}) + f(\mathbf{z})$ . This implies that for a sufficiently big  $C_\infty$ , the inequality (24) holds for arbitrary  $\Delta_v(y^1, \dots, y^M)$ .  $\square$

*Proof of Theorem 2.* Since energy  $E$  and diversity measure  $\Delta^M$  satisfy conditions of Lemma 1, the ordering enforcing problem (12) delivers solution to the  $M$ -best-diverse problem (13). Moreover, since each component  $\Delta_v^M$  of  $\Delta^M$  satisfies conditions of Lemma 2, the function  $\hat{\Delta}^M$  is supermodular and  $-\hat{\Delta}^M$  is submodular. Since energy  $E$  is submodular either, the ordering enforcing energy  $\hat{E}^M$  is submodular as sum of submodular functions.  $\square$

## References

- [1] T.H. Cormen, C.E. Leiserson, R.L. Rivest, C. Stein. *Introduction to algorithms third edition*. 2009.
